# Supplementary material
Source: MDPI journal article supplement (https://www.mdpi.com/2312-7481/3/1/8)
Supplement: s1 [file s1]

# Supplementary Materials: New Ethylenedithio-TTF Containing a 2,2,5,5-Tetramethylpyrrolin-1-yloxy Radical through a Vinylene Spacer and Its $\text{FeCl}_4^-$ Salt—Synthesis, Physical Properties and Crystal Structure Analyses

Kazuki Horikiri and Hideki Fujiwara

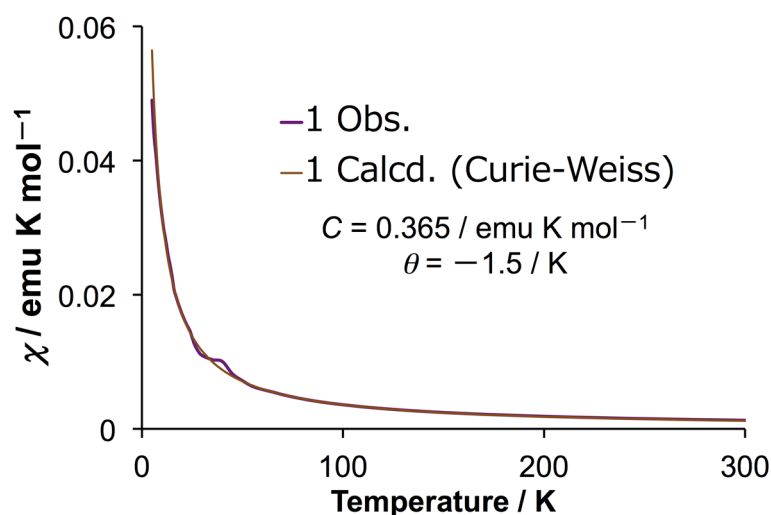

(a)

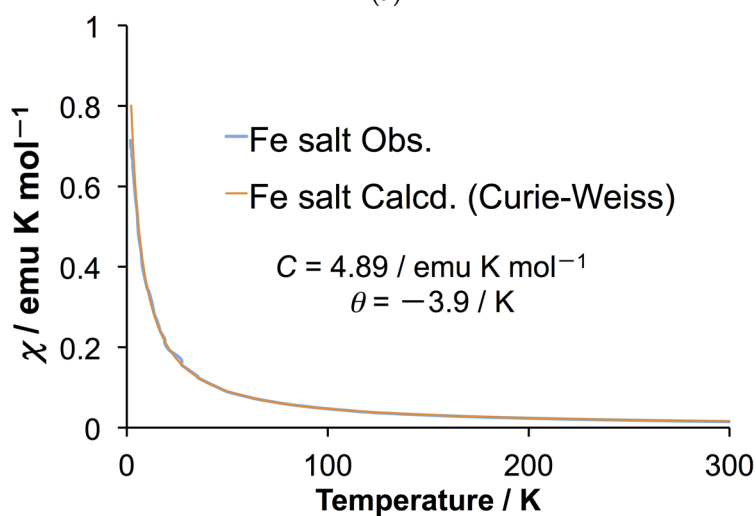

(b)

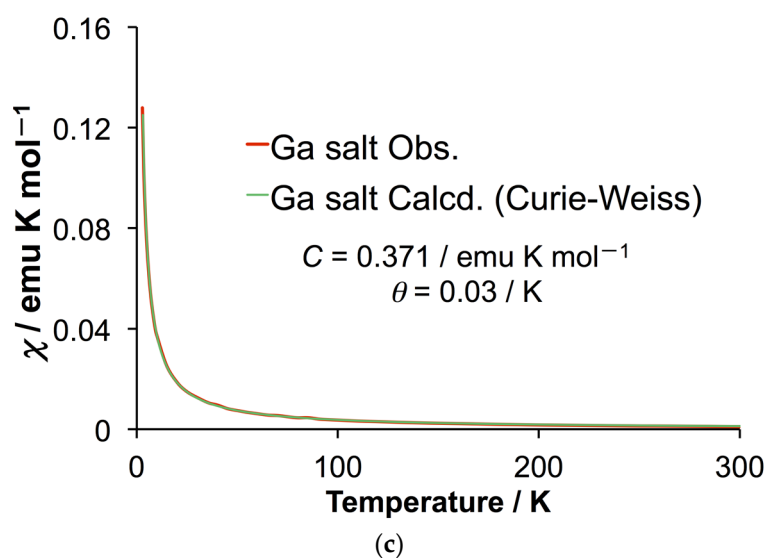

**Figure S1.** The temperature dependences of magnetic susceptibilities of neutral donor **1** (a), 1·FeCl<sub>4</sub> (b) and 1·GaCl<sub>4</sub> (c) measured in the temperatures range of 2–300 K under the applied field of 10 kOe. Calcd. lines indicate Curie-Weiss fittings of the data.
